# Supplementary material for: COVID-19 and excess mortality in the United States: A county-level analysis
Source: PubMed Central journal article supplement (PMC8136644; doi:10.1371/journal.pmed.1003571), 2021-05-20
Supplement: pmed.1003571.s001.pdf [file pmed.1003571.s001.pdf]

**S1 Fig.** Flowchart Detailing Sample Exclusions

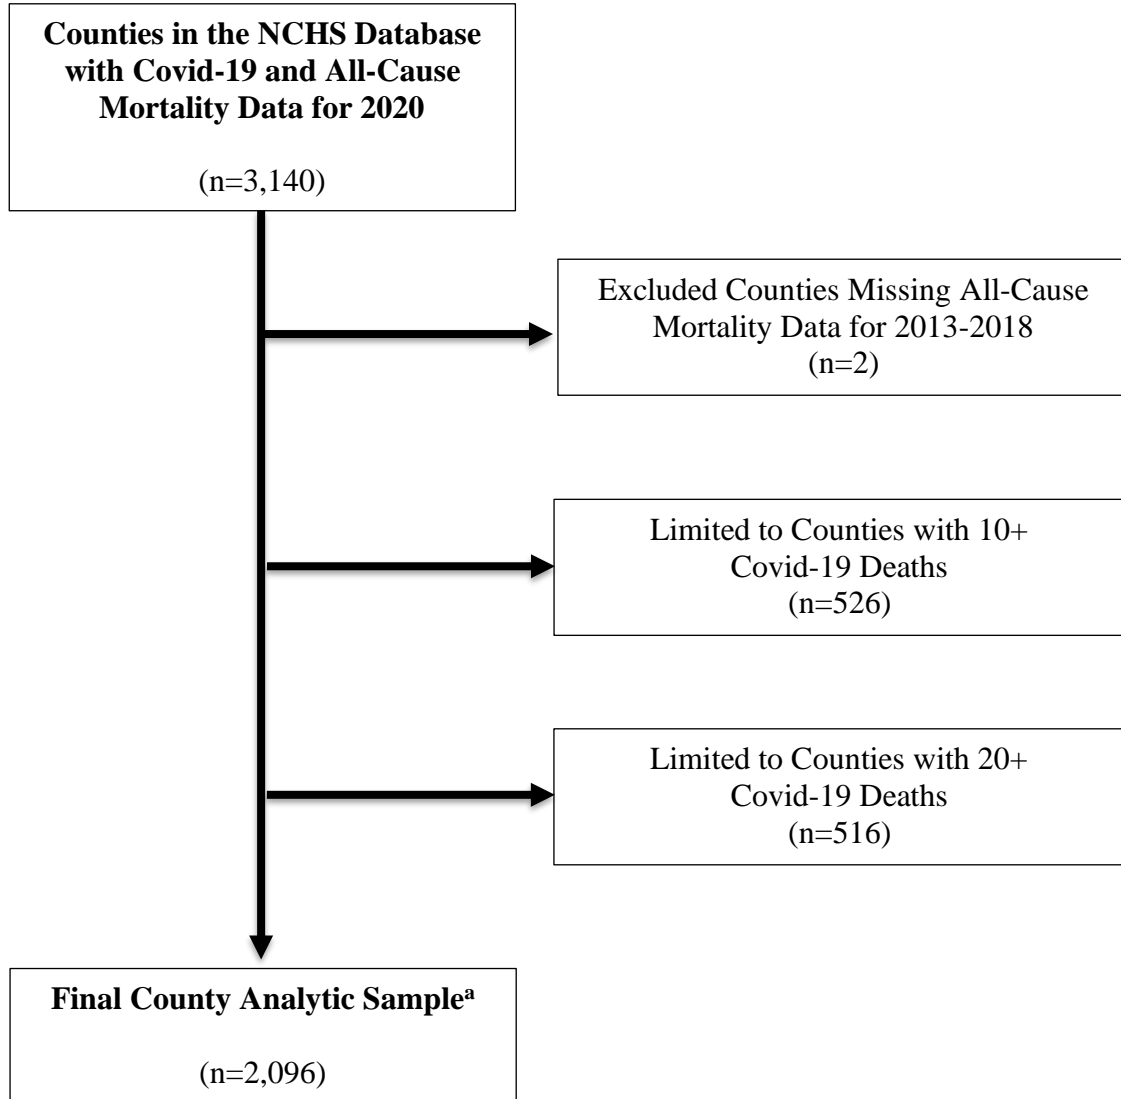

a. Counties had complete data for each of the sociodemographic and health characteristics we examined.
