# Supplementary material for: COVID-19 and excess mortality in the United States: A county-level analysis
Source: PubMed Central journal article supplement (PMC8136644; doi:10.1371/journal.pmed.1003571), 2021-05-20
Supplement: pmed.1003571.s002.pdf [file pmed.1003571.s002.pdf]

**S2 Fig.** US County Map Showing Geographic Distribution of Sample Counties (n=2,096)<sup>a</sup>

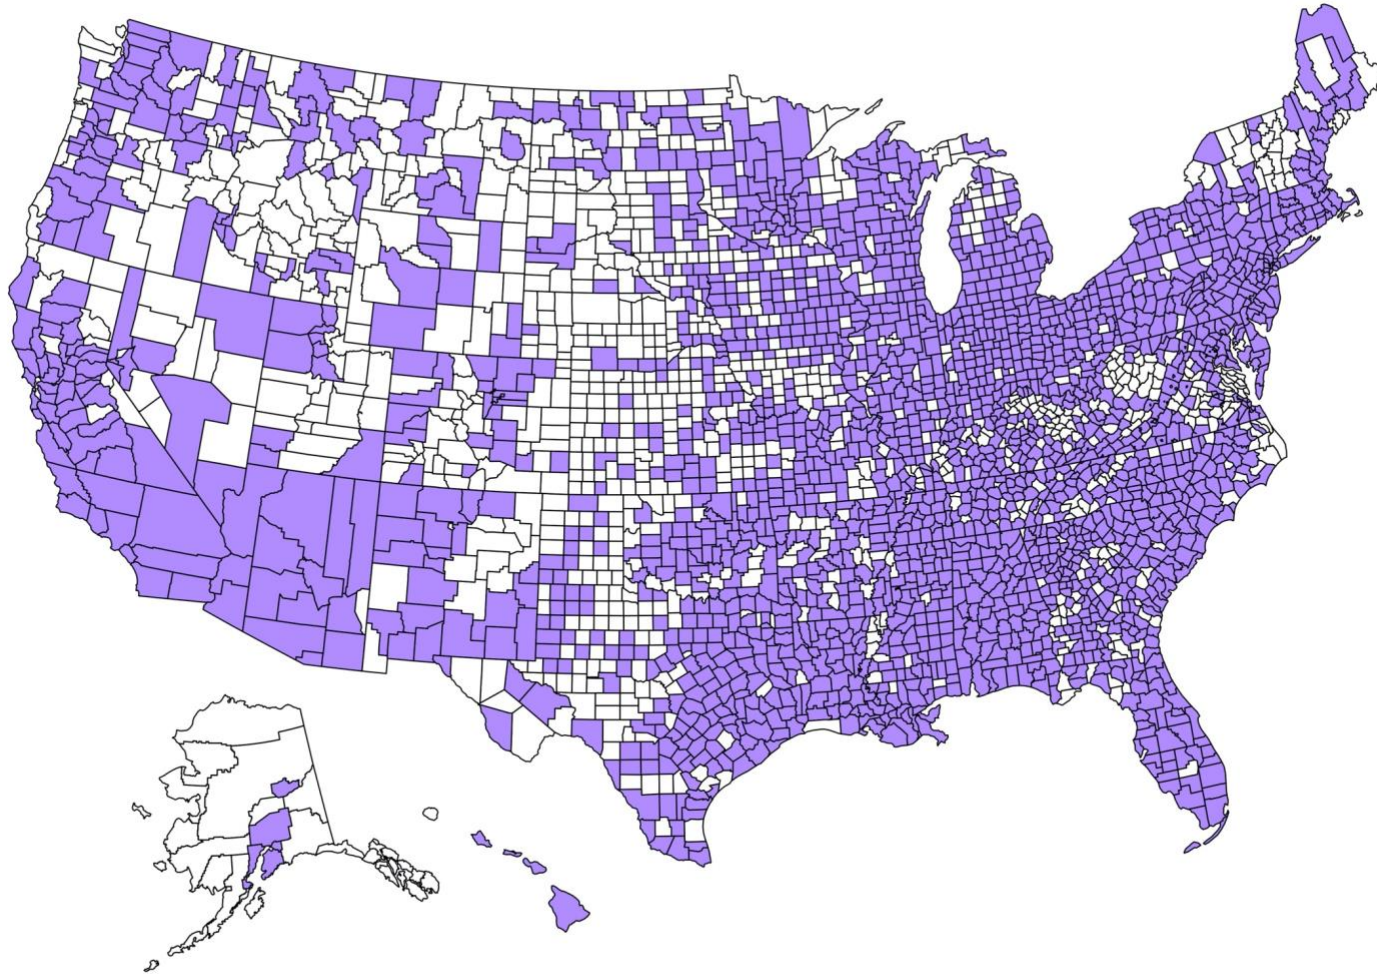

a. Map created using the usmap package in RStudio (<https://CRAN.R-project.org/package=usmap>)
