# Supplementary material for: COVID-19 and excess mortality in the United States: A county-level analysis
Source: PubMed Central journal article supplement (PMC8136644; doi:10.1371/journal.pmed.1003571), 2021-05-20
Supplement: pmed.1003571.s004.pdf [file pmed.1003571.s004.pdf]

**S4 Fig.** Decomposition of 2020 Indirectly Age Standardized Excess Death Rates across Strata of Sociodemographic and Health Factors<sup>a,b</sup>

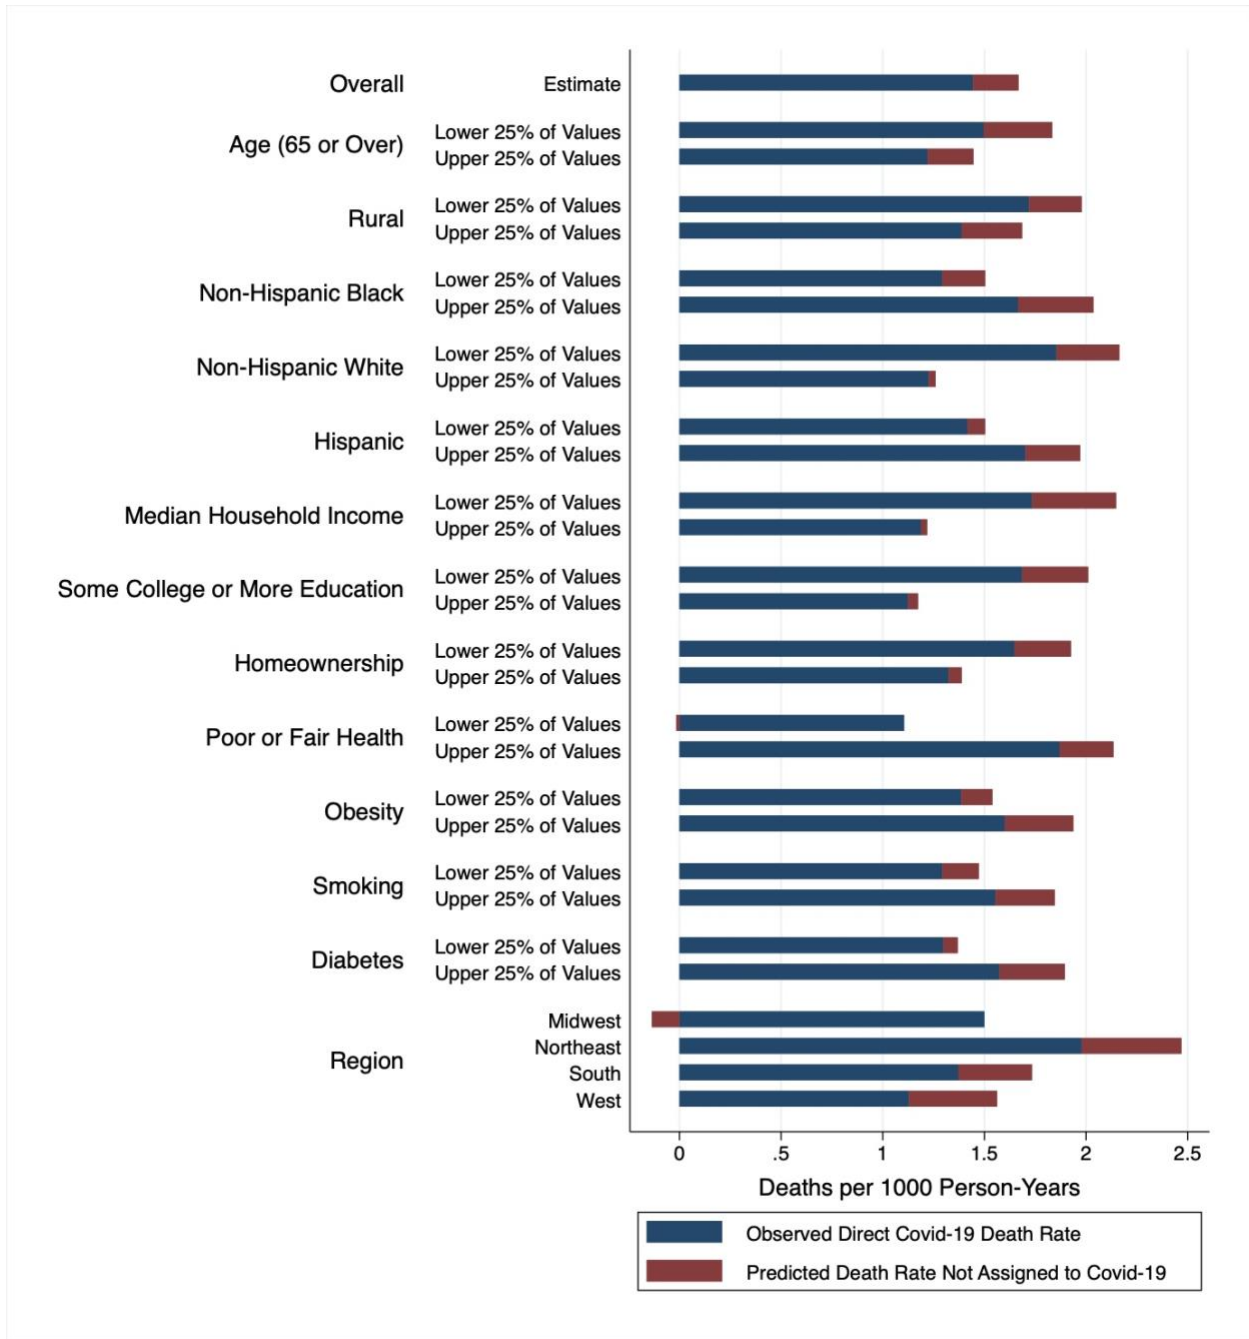

a. n = 2,096 counties

b. Predicted death rates generated from primary model:  $M(i) = \alpha + \beta_1 M^*(i) + \beta_2 C(i)$ , where  $M(i)$  = Death rate from all causes in county  $i$  in 2020,  $M^*(i)$  = Death rate from all causes, county  $i$  in 2013-2018, and  $C(i)$  = Covid-19 death rate in county  $i$  in 2020. The model was weighted by the 2020 population and fully stratified into population weighted quartiles for each sociodemographic or health factor. The death rates for the upper and lower 25% of values for each factor are presented in this figure.
