# Supplementary material for: COVID-19 and excess mortality in the United States: A county-level analysis
Source: PubMed Central journal article supplement (PMC8136644; doi:10.1371/journal.pmed.1003571), 2021-05-20
Supplement: pmed.1003571.s006.pdf [file pmed.1003571.s006.pdf]

**S2 Table.** Data Sources and Years for County-Level Factors

| <b>Variable</b>               | <b>Data Source:</b>                                    |
|-------------------------------|--------------------------------------------------------|
| % 65 Years and Older          | Census Population Estimates, 2018                      |
| % Rural                       | Census Population Estimates, 2010                      |
| % Hispanic                    | Census Population Estimates, 2018                      |
| % Non-Hispanic Black          | Census Population Estimates, 2018                      |
| % Non-Hispanic White          | Census Population Estimates, 2018                      |
| Median Household Income       | Small Area Income and Poverty Estimates, 2018          |
| % with Some College or Higher | American Community Survey, 5-year estimates, 2014-2018 |
| % Homeownership               | American Community Survey, 5-year estimates, 2014-2018 |
| % with Poor or Fair Health    | Behavioral Risk Factor Surveillance System, 2017       |
| % with Obesity                | United States Diabetes Surveillance System, 2016       |
| % who Smoke                   | Behavioral Risk Factor Surveillance System, 2017       |
| % with Diabetes               | United States Diabetes Surveillance System, 2016       |
