# Supplementary material for: COVID-19 and excess mortality in the United States: A county-level analysis
Source: PubMed Central journal article supplement (PMC8136644; doi:10.1371/journal.pmed.1003571), 2021-05-20
Supplement: pmed.1003571.s007.pdf [file pmed.1003571.s007.pdf]

**S3 Table.** Comparison of OLS, Indirectly Age Standardized and Negative Binomial Models

| Model                                        | Number of Excess Deaths per 1 Directly Coded Covid-19 Death | % Excess Deaths Not Attributed to Covid-19 |
|----------------------------------------------|-------------------------------------------------------------|--------------------------------------------|
| OLS Model <sup>a,b</sup>                     | 1.20 [95% CI (1.16, 1.24)]                                  | 17% [95% CI (14%, 19%)]                    |
| OLS Model, Age-Standardized <sup>a,b,c</sup> | 1.15 [95% CI (1.12, 1.19)]                                  | 13% [95% CI (11%, 16%)]                    |
| Negative Binomial Model <sup>d,e</sup>       | 1.28                                                        | 22%                                        |

a. The OLS models were specified as  $M(i) = \alpha + \beta_1 M^*(i) + \beta_2 C(i)$ , where  $M(i)$  = Death rate from all causes in county  $i$  in 2020,  $M^*(i)$  = Death rate from all causes, county  $i$  in 2013-2018, and  $C(i)$  = Covid-19 death rate in county  $i$  in 2020. Model weighted by the 2020 population. For the Negative Binomial model,  $M(i)$  = deaths from all-causes in county  $i$  in 2020 rather than the death rate, with the 2020 population used as an offset.

b. Number of excess deaths per 1 directly coded Covid-19 death is equivalent to the regression coefficient for directly coded Covid-19 deaths.

c. Death rates were indirectly age-standardized.

d. To calculate the number of excess deaths per 1 directly coded Covid-19 deaths, we used marginal prediction to calculate the all-cause death rate in 2020 at values of directly coded Covid-19 mortality that were +/- 0.1 deaths per 1000 people from the weighted mean of directly coded Covid-19 mortality. The change in all-cause mortality between these values was divided by 0.2 deaths per 1000 people to yield the number of excess deaths per 1 directly coded Covid-19 death.

e. A Poisson model was tested prior to the Negative Binomial model but was rejected due to poor goodness of fit.
