# Supplementary material for: COVID-19 and excess mortality in the United States: A county-level analysis
Source: PubMed Central journal article supplement (PMC8136644; doi:10.1371/journal.pmed.1003571), 2021-05-20
Supplement: pmed.1003571.s008.pdf [file pmed.1003571.s008.pdf]

**S4 Table.** Boundaries for Sociodemographic and Health Characteristic Quartiles<sup>a</sup>

| <b>Characteristics</b>            | <b>Lower 25% Quartile</b> |                      | <b>Upper 25% Quartile</b> |                      |
|-----------------------------------|---------------------------|----------------------|---------------------------|----------------------|
|                                   | <b>Lowest Value</b>       | <b>Highest Value</b> | <b>Lowest Value</b>       | <b>Highest Value</b> |
| % 65 or Older                     | 7.4%                      | 13.6%                | 17.6%                     | 57.6%                |
| % Rural                           | 0%                        | 1.3%                 | 24.3%                     | 100%                 |
| % Hispanic                        | 0.6%                      | 5.7%                 | 26.0%                     | 96.4%                |
| % Non-Hispanic Black              | 0.1%                      | 3.6%                 | 18.6%                     | 85.4%                |
| % Non-Hispanic White              | 2.7%                      | 42.1%                | 77.9%                     | 97.9%                |
| Median Household Income           | 25,385                    | 52,577               | 74,686                    | 140,382              |
| % with Some College or Higher     | 20.4%                     | 60.3%                | 71.8%                     | 90.3%                |
| % Homeownership                   | 19.6%                     | 56.9%                | 71.0%                     | 89.8%                |
| % Living with Poor or Fair Health | 8.1%                      | 14.0%                | 18.9%                     | 41.0%                |
| % with Obesity                    | 14.4%                     | 24.9%                | 32.8%                     | 51.0%                |
| % who Smoke                       | 5.9%                      | 12.6%                | 17.6%                     | 41.5%                |
| % with Diabetes                   | 2.9%                      | 8.4%                 | 11.5%                     | 34.1%                |

a. Quartiles are weighted by the estimated 2020 population.
